# Supplementary material for: Synthetic control of network topology and pore structure in microporous polyimides based on triangular triphenylbenzene and triphenylamine units
Source: Royal Society of Chemistry journal article supplement (doi:10.1039/c1sm05315a), 2011-01-01
Supplement: c1sm05315a.pdf [file c1sm05315a.pdf]

## ELECTRONIC SUPPLEMENTARY INFORMATION

### **Synthetic control of network topology and pore structure in microporous polyimides based on triangular triphenylbenzene and triphenylamine units**

*Zhonggang Wang,\* Bufeng Zhang, Hao Yu, Guiyang Li, Yajie Bao*

*Department of Polymer Science and Materials, State Key Laboratory of Fine Chemicals, School of Chemical Engineering, Dalian University of Technology, Dalian, 116024, China.*

zgwang@dlut.edu.cn

#### **Contents**

**Fig. S1** TGA curves of the four polyimides.

**Fig. S2** WAXD patterns of polyimide networks.

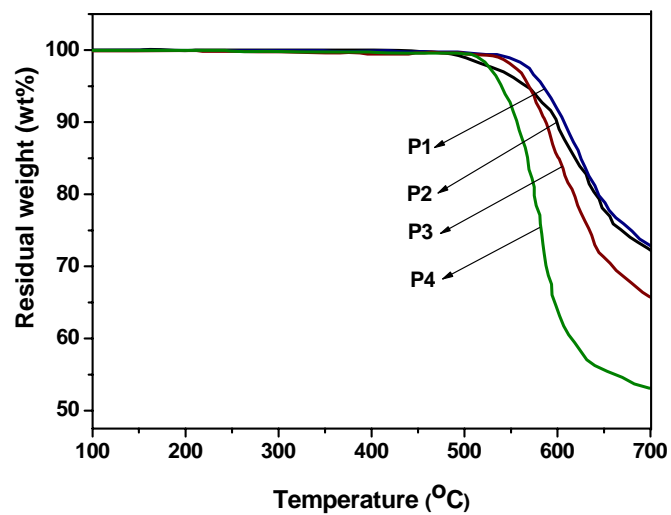

**Fig. S1** TGA curves of the four polyimides.

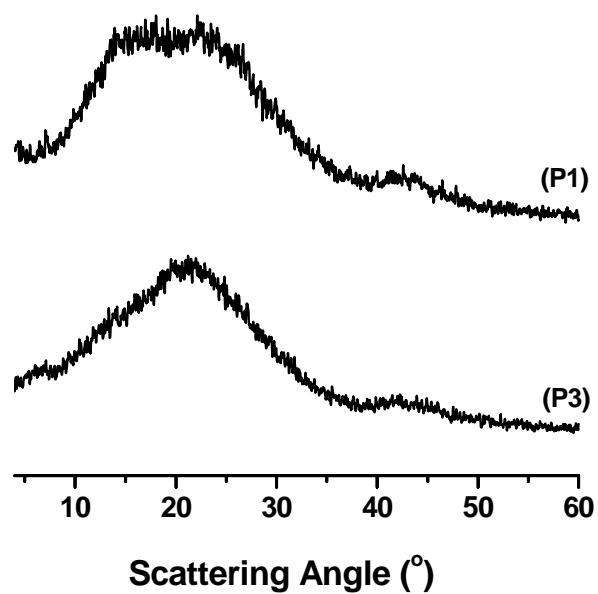

**Fig. S2** WAXD patterns of polyimide networks
